# Supplementary material for: 2,7-Diazapyrenes: a brief review on synthetic strategies and application opportunities
Source: Royal Society of Chemistry journal article supplement (doi:10.1039/d2ra00260d), 2022-01-01
Supplement: d2ra00260d1.pdf [file d2ra00260d1.pdf]

## Electronic Supplementary Information

### **2,7-Diazapyrenes: a brief review on synthetic strategies and application opportunities**

Anindita Mukherjee,<sup>a</sup> Alexey A. Akulov,<sup>a</sup> Sougata Santra,<sup>\*a</sup> Mikhail V. Varaksin,<sup>a,b</sup> Grigory A. Kim<sup>b</sup>, Dmitry S. Kopchuk<sup>a,b</sup>, Olga S. Taniya,<sup>a</sup> Grigory V. Zyryanov,<sup>\*a,b</sup> and Oleg. N. Chupakhin<sup>a,b</sup>

<sup>a</sup> Ural Federal University named after the first President of Russia B.N. Yeltsin, 19 Mira str. Yekaterinburg, 620002, Russian Federation

\*Corresponding authors' email: sougatasantra85@gmail.com (S. Santra); gvzyryanov@gmail.com (G. V. Zyryanov)

<sup>b</sup> I. Ya. Postovskiy Institute of Organic Synthesis, UB of the RAS, 22 S. Kovalevskoy Str., Yekaterinburg, 620219, Russian Federation

The calculations were carried out as reported earlier [1-4] in the Orca 4.0.1 software package using the DFT B3LYP, 6-311G \* method. The calculations in a solvent were carried out by the CPCM solvation method [5].

**Table S1.** HOMO-LUMO distributions of 2,7-diazapyrenes in a gas phase

| #  | Structure                                                                          | HOMO-1                                                                                          | HOMO                                                                                           | LUMO                                                                                            | LUMO+1                                                                                           | E <sub>0-0</sub> | Absorption bands                                                                     |
|----|------------------------------------------------------------------------------------|-------------------------------------------------------------------------------------------------|------------------------------------------------------------------------------------------------|-------------------------------------------------------------------------------------------------|--------------------------------------------------------------------------------------------------|------------------|--------------------------------------------------------------------------------------|
| 1. | 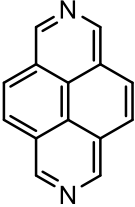  | -7.1346<br>    | -5.9814<br>   | -2.1156<br>   | -1.6774<br>   | 3.8658           |   |
| 2. |   | -10.5139<br>   | -9.9152<br>   | -6.3504<br>   | -6.1311<br>   | 3.5648           |   |
| 3. |  | -10.3920<br> | -9.7740<br> | -6.1724<br> | -5.9879<br> | 3.6016           |  |

|    |                                                                                    |                                                                                               |                                                                                               |                                                                                                |                                                                                                 |        |                                                                                     |
|----|------------------------------------------------------------------------------------|-----------------------------------------------------------------------------------------------|-----------------------------------------------------------------------------------------------|------------------------------------------------------------------------------------------------|-------------------------------------------------------------------------------------------------|--------|-------------------------------------------------------------------------------------|
| 4. | 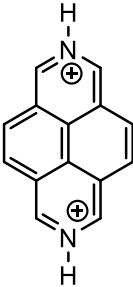  | -15.0642<br> | -13.9682<br> | -10.4358<br> | -10.0694<br> | 3.5324 |  |
| 5. |   | -14.6932<br> | -13.5723<br> | -9.9681<br>  | -9.6769<br>  | 3.6042 |  |
| 6. |  |                                                                                               | -2.5108<br> | -1.4594<br> |                                                                                                 | 1.0514 |                                                                                     |

|    |                                                                                   |  |         |         |  |        |  |
|----|-----------------------------------------------------------------------------------|--|---------|---------|--|--------|--|
| 7. | 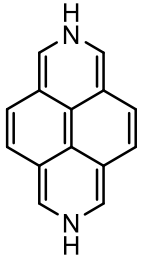 |  | -2.6134 | -1.4975 |  | 1.1159 |  |
|----|-----------------------------------------------------------------------------------|--|---------|---------|--|--------|--|

**Table S2.** Dipole moments of 2,7-diazapyrenes in a gas phase

| # | Structure                                                                           | Dipole moment, Debye                                                                            |
|---|-------------------------------------------------------------------------------------|-------------------------------------------------------------------------------------------------|
| 1 | 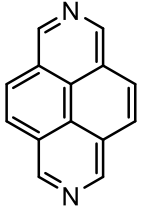   | 0.00000<br>    |
| 2 |  | 12.21599<br> |

|   |                                                                                                                                 |                                                                                                    |
|---|---------------------------------------------------------------------------------------------------------------------------------|----------------------------------------------------------------------------------------------------|
| 3 | 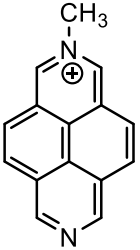 <p>CH<sub>3</sub></p>                         | <p>11.76324</p>   |
| 4 |  <p>H</p> <p>H</p>                             | <p>0.00000</p>   |
| 5 |  <p>CH<sub>3</sub></p> <p>CH<sub>3</sub></p> | <p>0.00000</p>  |

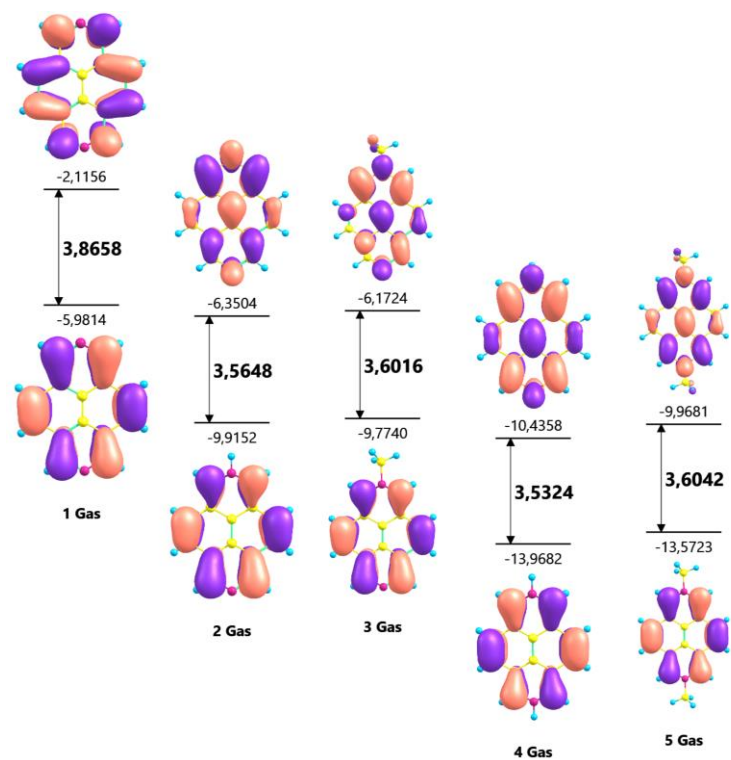

**Figure S1.** HOMO-LUMO distributions of 2,7-diazapyrenes **1-5**

**Table S3.** Structure optimization of 2,7-diazapyrenes in a gas phase

| # | Structure | Optimization |
|---|-----------|--------------|
| 1 |           |              |

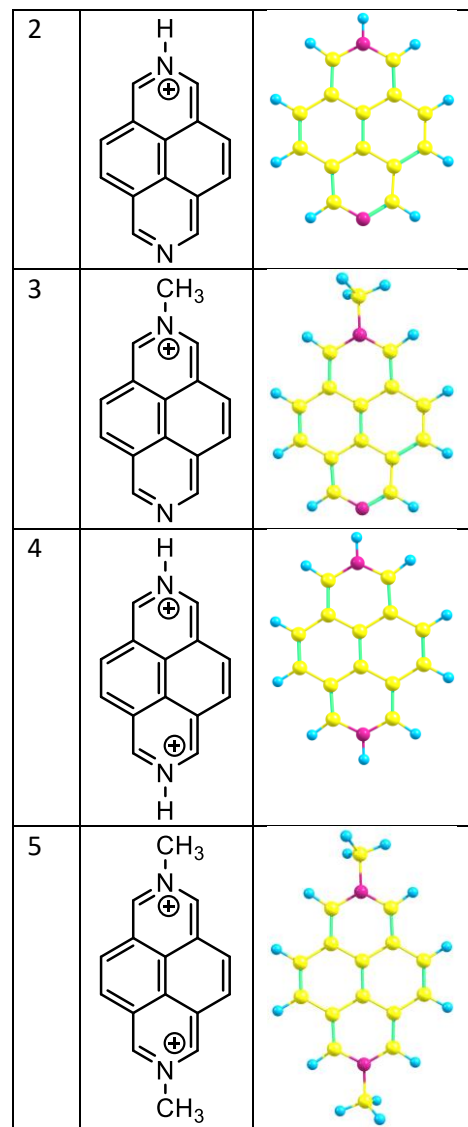

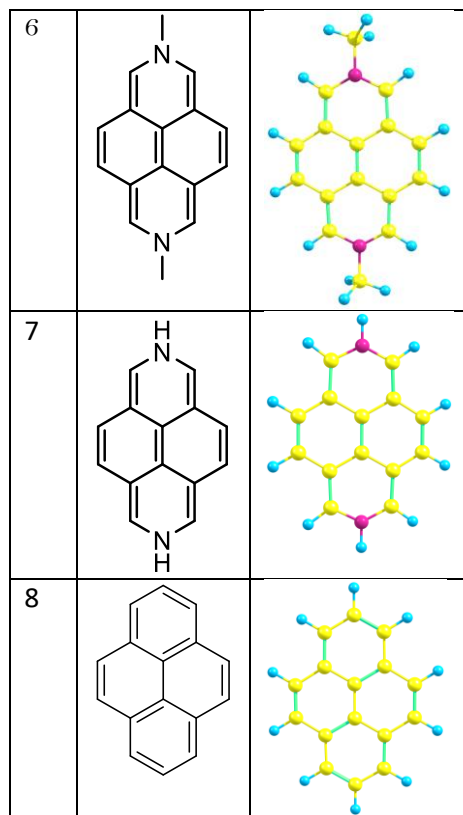

#### References:

1. R. Krishnan, J. S. Binkley, R. Seeger and J. A. Pople, *J. Chem. Phys.* 72, 650 (1980)
2. A. D. McLean and G. S. Chandler *J. Chem. Phys.* 72, 5639, (1980)
3. T. Clark, J. Chandrasekhar and P. v. R. Schleyer, *J. Comp. Chem.* 4, 294 (1983)
4. M. J. Frisch, J. A. Pople and J. S. Binkley, *J. Chem. Phys.* 80, 3265 (1984)
6. Neese, F. "The ORCA program system" *Wiley interdisciplinary Reviews - Computational Molecular Science*, 2012, Vol 2., Issue 1, Pages 73-78
